## RESEARCH ARTICLE

# Septate junctions regulate gut homeostasis through regulation of stem cell proliferation and enterocyte behavior in *Drosophila*

Yasushi Izumi<sup>1,2,\*</sup>, Kyoko Furuse<sup>1</sup> and Mikio Furuse<sup>1,2,\*</sup>

## ABSTRACT

Smooth septate junctions (sSJs) contribute to the epithelial barrier, which restricts leakage of solutes through the paracellular route in epithelial cells of the *Drosophila* midgut. We previously identified three sSJ-associated membrane proteins, Ssk, Mesh and Tsp2A, and showed that these proteins were required for sSJ formation and intestinal barrier function in the larval midgut. Here, we investigated the roles of sSJs in the *Drosophila* adult midgut. Depletion of any of the sSJ proteins from enterocytes resulted in remarkably shortened lifespan and intestinal barrier dysfunction in flies. Interestingly, the sSJ-protein-deficient flies showed intestinal hypertrophy accompanied by accumulation of morphologically abnormal enterocytes. The phenotype was associated with increased stem cell proliferation and activation of the MAPK and Jak-Stat pathways in stem cells. Loss of the cytokines Unpaired 2 and Unpaired 3, which are involved in Jak-Stat pathway activation, reduced the intestinal hypertrophy, but not the increased stem cell proliferation, in flies lacking Mesh. The present findings suggest that sSJs play a crucial role in maintaining tissue homeostasis through regulation of stem cell proliferation and enterocyte behavior in the *Drosophila* adult midgut.

**KEY WORDS:** *Drosophila*, Midgut, Smooth septate junction, Epithelial cell, Intestinal stem cell, Tissue homeostasis

## INTRODUCTION

The intestinal epithelium serves as a physical barrier that prevents infiltration of food-derived harmful substances, microbial contaminants and digestive enzymes into the body. To constitute an effective intestinal barrier, specialized cell–cell junctions, namely occluding junctions, play a crucial role in regulating free diffusion of solutes through the paracellular route. Septate junctions (SJs) are occluding junctions in invertebrates and act as the functional counterparts of vertebrate tight junctions (Anderson and Van Itallie, 2009; Furuse and Tsukita, 2006; Lane et al., 1994; Tepass and Hartenstein, 1994). In arthropods, morphological variation of SJs has been observed among different types of epithelia (Lane et al., 1994; Tepass and Hartenstein, 1994). Most ectodermally derived epithelia and the perineural sheath have pleated SJs (pSJs), while endodermally derived epithelia, including the midgut, have smooth SJs (sSJs) (Lane et al., 1994; Tepass and Hartenstein, 1994). Genetic and molecular analyses in *Drosophila* have revealed a number of molecular components and functional properties of pSJs

(Tepass et al., 2001; Wu and Beitel, 2004; Banerjee et al., 2006; Izumi and Furuse, 2014). In contrast, few studies have been carried out on sSJs, and their physiological role is not well understood. Recently, we identified three sSJ-specific membrane proteins: Ssk, Mesh and Tsp2A. Ssk is a four transmembrane domain-containing protein (Yanagihashi et al., 2012). Mesh is a single-pass membrane protein containing a large extracellular region (Izumi et al., 2012). Tsp2A belongs to the tetraspanin family (Izumi et al., 2016). Zygotic loss of any of these proteins results in embryonic lethality just before hatching or at the first-instar larval stage with impairment of sSJ formation as well as epithelial barrier function, suggesting that sSJs have critical roles (Yanagihashi et al., 2012; Izumi et al., 2012, 2016; Izumi and Furuse, 2014; Furuse and Izumi, 2017).

The *Drosophila* adult midgut epithelium is composed of absorptive enterocytes (ECs), secretory enteroendocrine cells (EEs), intestinal stem cells (ISCs), EC progenitors (enteroblasts; EBs) and EE progenitors (enteroendocrine mother cells; EMCs) (Micchelli and Perrimon, 2006; Ohlstein and Spradling, 2006; Guo and Ohlstein, 2015). The sSJs are formed between adjacent ECs, and between ECs and EEs (Resnik-Docampo et al., 2017). ECs and EEs are continuously renewed by proliferation and differentiation of the ISC lineage through the production of intermediate differentiating cells, EBs and EMCs. This renewal of adult midgut epithelial cells is critical for maintenance of homeostasis in the adult midgut. Recent studies have suggested that sSJs influence proliferation and differentiation of the ISC lineage in the adult midgut. Experimental suppression of Gliotactin, a tricellular junction-associated protein, in ECs leads to epithelial barrier dysfunction, increased ISC proliferation and blockade of EC differentiation in young flies (Resnik-Docampo et al., 2017). Moreover, loss of *mesh* and *Tsp2A* in clones causes defects in polarization and integration of ECs in the adult midgut (Chen et al., 2018). Thus, it will be interesting to examine the role of sSJs in the adult midgut in terms of the regulation of ISC proliferation and tissue homeostasis by genetic ablation of the sSJ-protein-encoding genes throughout ECs.

Here, we describe that depletion of the sSJ proteins Ssk, Mesh and Tsp2A from ECs causes remarkably reduced lifespan and midgut barrier dysfunction in flies. The sSJ-protein-deficient flies show intestinal hypertrophy accompanied by accumulation of morphologically aberrant ECs and increased stem cell proliferation. Interestingly, we show that the interleukin-6-like cytokines Unpaired 2 (Upd2) and/or Unpaired 3 (Upd3) are involved in this intestinal hypertrophy. We conclude that sSJs are crucial for the regulation of stem cell proliferation and EC behavior in the *Drosophila* adult midgut.

## RESULTS

### Depletion of sSJ proteins from ECs in adult flies results in shortened lifespan and midgut barrier dysfunction

To investigate the effect of sSJ protein depletion on the *Drosophila* adult midgut, inducible RNAi for the sSJ proteins was expressed

<sup>1</sup>Division of Cell Structure, National Institute for Physiological Sciences, Okazaki 444-8787, Japan. <sup>2</sup>Department of Physiological Sciences, The Graduate University of Advanced Studies, SOKENDAI, Okazaki 444-8585, Japan.

\*Authors for correspondence (yizumi@nips.ac.jp; furuse@nips.ac.jp)

 Y.I., 0000-0001-6726-1246

using the GAL4/UAS system with an EC-specific driver *Myo1A-GAL4* and the temperature-sensitive GAL4 repressor, *tubGal80<sup>ts</sup>* (McGuire et al., 2004; Jiang et al., 2009). The UAS-RNAi lines used for the sSJ proteins were UAS-*ssk*-RNAi, *mesh*-RNAi (NIG-Fly stock 12074R-1) and *Tsp2A*-RNAi (NIG-Fly stock 11415R-2), which had been previously confirmed to effectively reduce the expression of their respective sSJ proteins (Yanagihashi et al., 2012; Izumi et al., 2012, 2016). *Myo1A-GAL4 tubGal80<sup>ts</sup> UAS-CD8-GFP* and UAS-*ssk*-RNAi, *-mesh*-RNAi or *-Tsp2A*-RNAi (*Myo1A<sup>ts</sup>>ssk*-RNAi, *mesh*-RNAi or *Tsp2A*-RNAi) flies were raised to adults at 18°C (permissive temperature) and then shifted to 29°C (non-permissive temperature) to inactivate GAL80, leading to activation of the GAL4/UAS system to express each UAS-driven transgene. Almost all flies expressing the RNAi that targets the sSJ protein transcripts (hereafter referred to as sSJp-RNAis) died within 10 days after transgene induction, while more than 95% of control flies (*Myo1A<sup>ts</sup>>CD8-GFP*) survived until 15 days after induction (Fig. 1A; Fig. S1A,B). Thus, reduced expression of sSJ proteins in ECs results in remarkably shortened lifespan in adult flies. Next, we examined whether the barrier function of the midgut was disrupted in sSJp-RNAis flies. According to the barrier integrity assay (Smurf assay) method (Rera et al., 2011, 2012), flies were fed a non-absorbable 800-Da blue food dye in sucrose solution and observed

for leakage of the dye from the midgut. At 3 days after transgene induction, reduced expression of any of the sSJ proteins in ECs led to a significant increase in flies with blue dye throughout their body cavity, indicating defective midgut barrier function (Fig. 1C). The proportion of flies with midgut barrier dysfunction was further increased at 5 days after transgene induction, compared with age-matched controls (Fig. 1B,C). Thus, we confirmed that sSJ proteins are required for the barrier function in the adult midgut, similar to the observations in the larval midgut (Yanagihashi et al., 2012; Izumi et al., 2012, 2016).

### Depletion of sSJ proteins from ECs leads to intestinal hypertrophy accompanied by accumulation of morphologically aberrant ECs in the midgut

The shortened lifespan and midgut barrier dysfunction in sSJ-protein-deficient flies prompted us to examine the organization of their midgut epithelium. At 5 days after transgene induction, a typical simple epithelium in which ECs expressed CD8-GFP driven by *Myo1A-GAL4* was observed in the control midgut (Fig. 2A,E,J,J'). Intriguingly, the organization of the epithelium was severely disrupted in the sSJp-RNAis midgut; a large number of ECs failed to become integrated into the epithelium and instead accumulated throughout the midgut lumen (Fig. 2B–D). In addition, the ECs

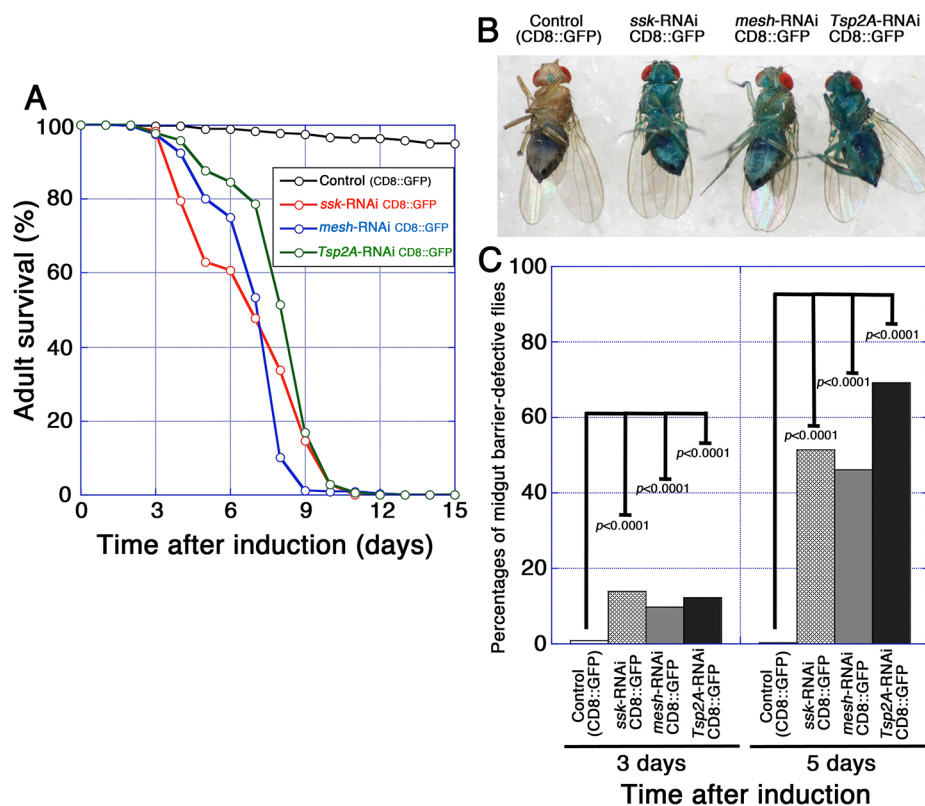

**Fig. 1. Depletion of sSJ proteins from ECs in adult flies results in shortened lifespan and midgut barrier dysfunction.** (A) Survival analysis of flies expressing *Myo1A<sup>ts</sup>-GAL4/UAS-CD8-GFP* without (control,  $n=240$ ) or with UAS-*ssk*-RNAi ( $n=220$ ), UAS-*mesh*-RNAi (15074R-1) ( $n=239$ ), or UAS-*Tsp2A*-RNAi (11415R-2) ( $n=220$ ). The transgenes were expressed with temperature-sensitive GAL80, and thus the flies were raised at 18°C until adulthood and then moved to 29°C. Each vial contained 20 flies (10 females, 10 males). (B,C) Barrier integrity assays (Smurf assays). Flies expressing *Myo1A<sup>ts</sup>-GAL4/UAS-CD8-GFP* with or without UAS-*ssk*-RNAi, UAS-*mesh*-RNAi or UAS-*Tsp2A*-RNAi were fed blue dye in sucrose solution. (B) A control fly and midgut barrier-defective sSJ-protein-deficient flies with blue body at 5 days after transgene induction. (C) Left to right: control (*CD8-GFP*) ( $n=264$ ), *ssk*-RNAi *CD8-GFP* ( $n=375$ ), *mesh*-RNAi *CD8-GFP* ( $n=531$ ) and *Tsp2A*-RNAi *CD8-GFP* ( $n=508$ ) at 3 days after induction; control (*CD8-GFP*) ( $n=232$ ), *ssk*-RNAi *CD8-GFP* ( $n=299$ ), *mesh*-RNAi *CD8-GFP* ( $n=384$ ) and *Tsp2A*-RNAi *CD8-GFP* ( $n=336$ ) at 5 days after induction. Loss of midgut barrier function was determined when dye was observed outside the midgut. Flies with blue color throughout the body were judged to be midgut barrier-defective flies although the tone of the color varied depending on the affected flies. Flies with reduced sSJ protein expression show loss of barrier function compared with control flies (*CD8-GFP* flies). The  $P$ -values in C represent significant differences in pairwise post-test comparisons indicated by the corresponding bars (Fisher's exact test).

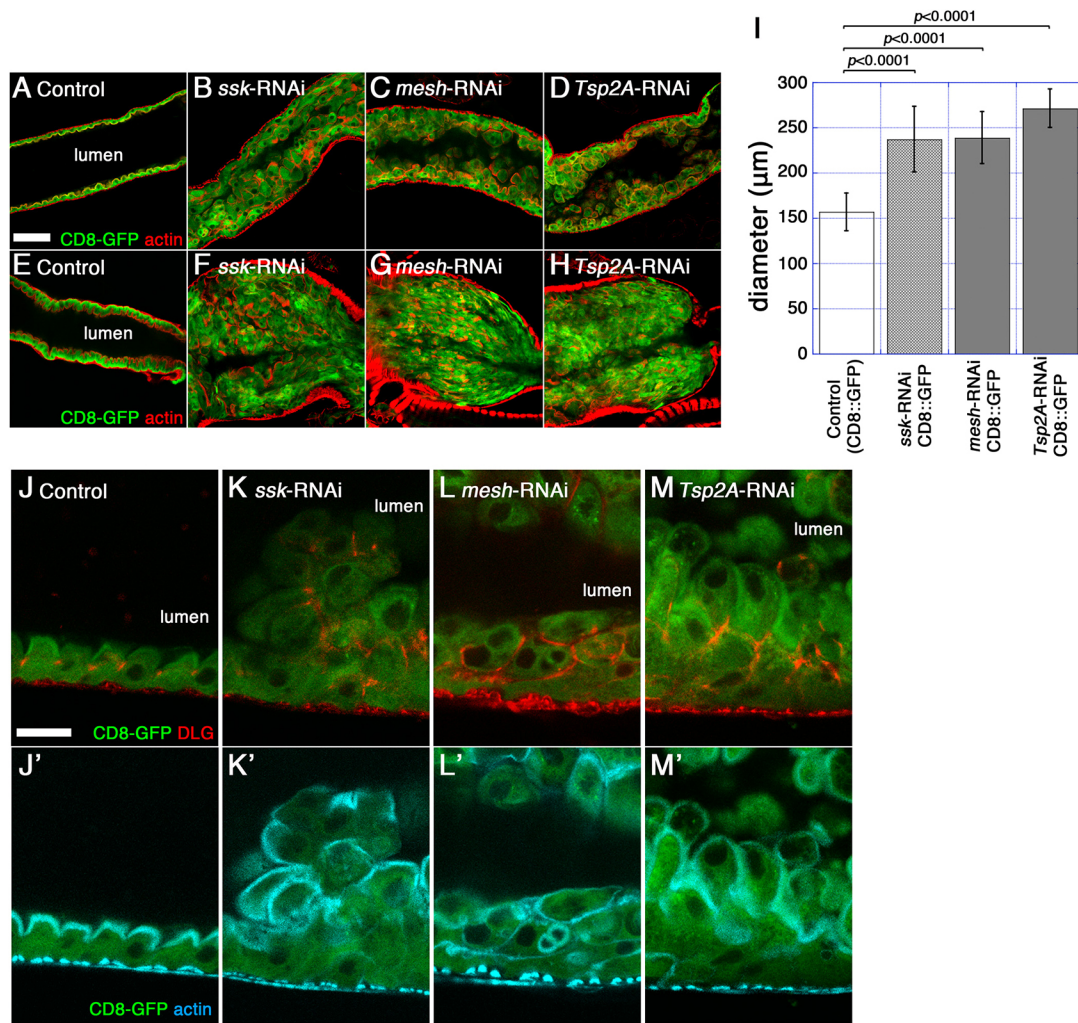

**Fig. 2. Depletion of sSJ proteins from ECs leads to intestinal hypertrophy accompanied by accumulation of morphologically aberrant ECs in the midgut.** (A–H) Confocal images of the adult midgut from *Myo1A<sup>ts</sup>-GAL4/UAS-CD8-GFP* without (A,E, control) or with *UAS-ssk-RNAi* (B,F), *UAS-mesh-RNAi* (C,G), or *UAS-Tsp2A-RNAi* (D,H) at 5 days after induction, stained for F-actin (red) and GFP (green). The images show longitudinal cross-sections through the center of the midgut. CD8–GFP driven by *Myo1A<sup>ts</sup>* was expressed in the ECs of each midgut. A large number of ECs with aberrant morphology have accumulated in the anterior (B–D) and posterior (F–H) midgut. The most posterior region of the *ssk*-RNAi midgut is severely expanded (E–H). Scale bar: 50 µm. (I) Diameter of the most posterior region of the midgut. The diameter of the midgut was measured just anterior to the Malpighian tubules. Left to right: control (*CD8-GFP*) ( $n=19$ ), *ssk*-RNAi *CD8-GFP* ( $n=24$ ), *mesh*-RNAi *CD8-GFP* ( $n=19$ ) and *Tsp2A*-RNAi *CD8-GFP* ( $n=22$ ) at 5 days after induction. Error bars show s.e.m. Statistical significance ( $P<0.0001$ ) was evaluated by one-way ANOVA with Tukey's multiple comparisons test. (J–M') Confocal images of the adult anterior midgut expressing *Myo1A<sup>ts</sup>-GAL4/UAS-CD8-GFP* without (J,J', control) or with *UAS-ssk-RNAi* (K,K'), *UAS-mesh-RNAi* (L,L') or *UAS-Tsp2A-RNAi* (M,M') at 5 days after induction stained for Dlg (red in J–M) and F-actin (blue in J'–M'). The images show longitudinal cross-sections through the center of the midgut. CD8–GFP driven by *Myo1A<sup>ts</sup>* was expressed in the ECs of each midgut. F-actin and Dlg are mislocalized in sSJ-protein-deficient ECs. J and J', K and K', L and L', and M and M' are each derived from the same sample. Scale bars: 20 µm.

exhibited a variety of aberrant appearances, implying a polarity defect (Fig. 2B–D, J–M'). Indeed, abnormal distributions of F-actin and Dlg, a cell polarity protein, were observed in sSJp-RNAi ECs (Fig. 2B–D, K–M, K'–M'). The most posterior part of the midgut had a hypertrophic phenotype; the lumen was filled with a large number of morphologically aberrant ECs and the diameter was severely expanded (Fig. 2F–I). We confirmed that expression of sSJp-RNAi in ECs led to decreased levels of the respective target proteins and mislocalization of other sSJ proteins in the midgut (Fig. S2). Additional RNAi lines for *mesh* and *Tsp2A* showed essentially the same phenotypes (Fig. S3). Toluidine Blue staining of semi-thin sections and ultrastructural analysis by transmission electron microscopy confirmed that morphologically aberrant cells were stratified in the sSJp-RNAi midgut (Fig. 3B–D, F–H), while a

monolayer of ECs with developed microvilli facing the lumen was observed in the control midgut (Fig. 3A, E). Notably, microvilli-like structures were often observed between stratified ECs in the sSJp-RNAi midgut (Fig. 3F, H–J). Thus, depletion of any of the sSJ proteins from ECs causes intestinal hypertrophy accompanied by dysplasia-like accumulation of ECs in the midgut lumen, suggesting that sSJ proteins are required for homeostasis of the midgut organization.

#### Depletion of sSJ proteins from ECs leads to increased ISC proliferation in the midgut

We speculated that the EC accumulation was caused by overproduction of ECs in the sSJp-RNAi midgut. Because regeneration of ECs depends on proliferation and differentiation of the ISC lineage, we examined whether proliferation of ISCs was



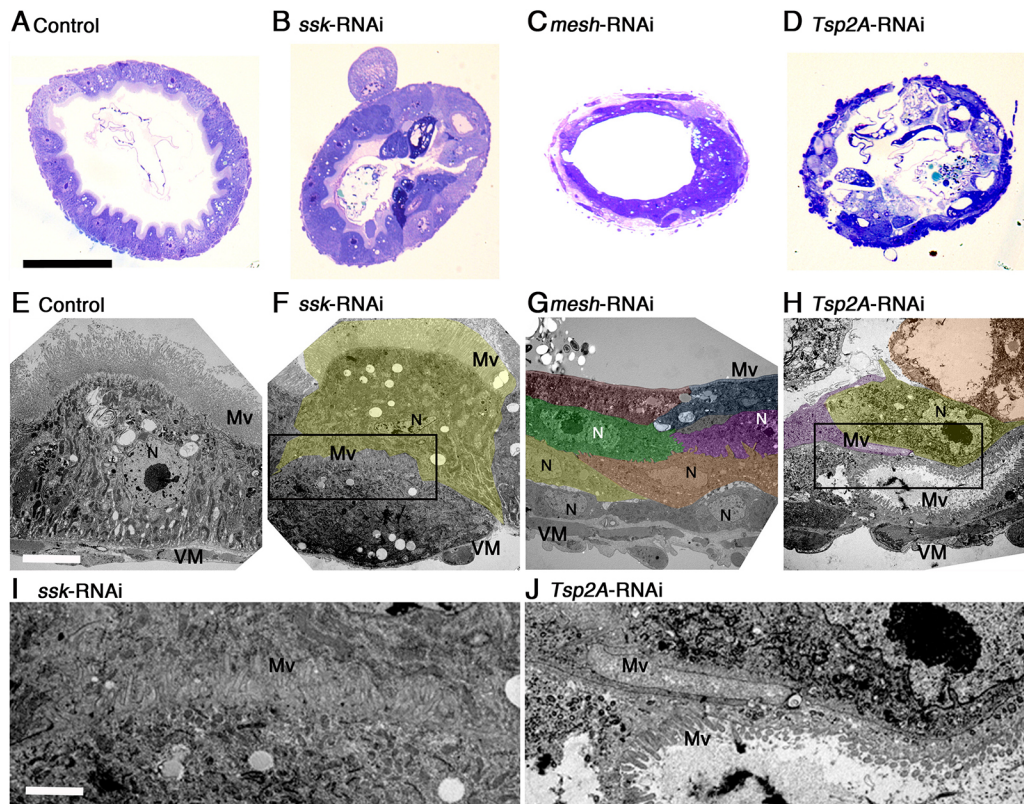

**Fig. 3. Morphologically aberrant cells are stratified in the sSJ-protein-deficient midgut.** (A–D) Toluidine Blue staining of the adult female anterior midgut in control (*CD8-GFP*) (A), *ssk*-RNAi *CD8-GFP* (B), *mesh*-RNAi *CD8-GFP* (C) and *Tsp2A*-RNAi *CD8-GFP* (D) flies at 5 days after induction. The images show transverse cross-sections of the midgut. Stratification of cells in the midgut lumen is observed in the sSJp-RNAis midgut. Scale bar: 500  $\mu$ m. (E–J) Transmission electron microscopy of the adult female anterior midgut in control (*CD8-GFP*) (E), *ssk*-RNAi *CD8-GFP* (F,I), *mesh*-RNAi *CD8-GFP* (G) and *Tsp2A*-RNAi *CD8-GFP* (H,J) flies at 5 days after induction. I and J are enlarged views of the regions outlined by the black boxes in F and H, respectively. Morphologically aberrant cells are stratified in the sSJp-RNAis midgut (F–H). The stratified cells are indicated by color background. Microvilli-like structures are found between stratified ECs in the sSJp-RNAis midgut (F,H–J). Scale bars: 5  $\mu$ m (E–H); 15  $\mu$ m (I,J). Mv, microvilli; VM, visceral muscles; N, nuclei.

increased in the sSJp-RNAis midgut. We stained the midgut with an antibody against phospho-histone H3 (PH3), a mitotic marker, and found that PH3-positive cells were markedly increased in the sSJp-RNAis midgut compared with the control midgut (Fig. 4A–D,E). Furthermore, immunostaining of the midgut with an antibody against Delta, an ISC marker (Ohlstein and Spradling, 2007), revealed that the number of ISCs were increased in the sSJp-RNAis midgut compared with the control midgut (Fig. 4A–D). We also confirmed that PH3-positive cells were Delta positive (Fig. 4A–D). Furthermore, the number of cells expressing Escargot (*Esg*)-LacZ, an ISC and EB marker (Micchelli and Perrimon, 2006), was increased in the *ssk*- or *mesh*-RNAi midgut (Fig. 4F–H). These results indicate that reduced expression of sSJ proteins in ECs leads to increased ISC proliferation. Of note, *Esg*-LacZ signals were often observed in cells expressing *CD8-GFP* driven by *Myo1A-GAL4* in the *ssk*- or *mesh*-RNAi midgut (Fig. 4J–K",L–N), suggesting that sSJ protein depletion causes mis-differentiation of the ISC lineage in the midgut.

In the adult midgut, the Ras-MAPK and Jak-Stat signaling pathways are required for activation of ISC proliferation during the regeneration of epithelial cells (Beebe et al., 2010; Buchon et al., 2010; Karpowicz et al., 2010; Shaw et al., 2010; Biteau and Jasper, 2011; Jiang et al., 2009, 2011; Osman et al., 2012; Zhou et al., 2013). Therefore, we examined whether these signaling pathways were activated in the sSJp-RNAis midgut. To monitor Ras-MAPK pathway activity, we examined the levels of di-phosphorylated ERK

(dpERK; in *Drosophila* the antibody recognizes the phosphorylated form of the Rolled protein) (Gabay et al., 1997). In control flies, the dpERK signals were barely detectable in the midgut (Fig. 5A,E). In contrast, intense dpERK signals were observed in the sSJp-RNAis midgut, not only in cells residing on the basal side of the epithelium, but also in some ECs (Fig. 5B–D,F–H), strongly suggesting that the Ras-MAPK pathway is activated in ISCs, EBs and certain ECs. To monitor Jak-Stat pathway activity, we used a Stat92E reporter line driving expression of DGFP (*10 $\times$ STAT-DGFP*). In the control midgut, few DGFP-positive cells were observed (Fig. 5I,M,Q), while DGFP-positive cells were markedly increased on the basal side of the epithelium throughout the sSJp-RNAis midgut (Fig. 5J–L,N–P,R–T). In addition, dpERK- and DGFP-positive signals were detected in *Esg*-LacZ-positive cells in the *mesh*-RNAi midgut (Fig. S4), indicating that the MAPK and Jak-Stat pathways were activated in the progenitor cells in the sSJ-disrupted midgut. Collectively, these results demonstrate that depletion of sSJ proteins from ECs results in activation of both the Ras-MAPK and Jak-Stat signaling pathways in the midgut.

#### **Simultaneous loss of *upd2* and *upd3* reduces the abnormal accumulation of ECs in the *mesh*-deficient midgut**

In ISC proliferation and EB differentiation, the Jak-Stat signaling pathway is activated by cytokines known as Unpaired (Upd) ligands (Jiang et al., 2009; Osman et al., 2012; Zhou et al., 2013). Upd2 and Upd3 have been reported to contribute to increased ISC division in



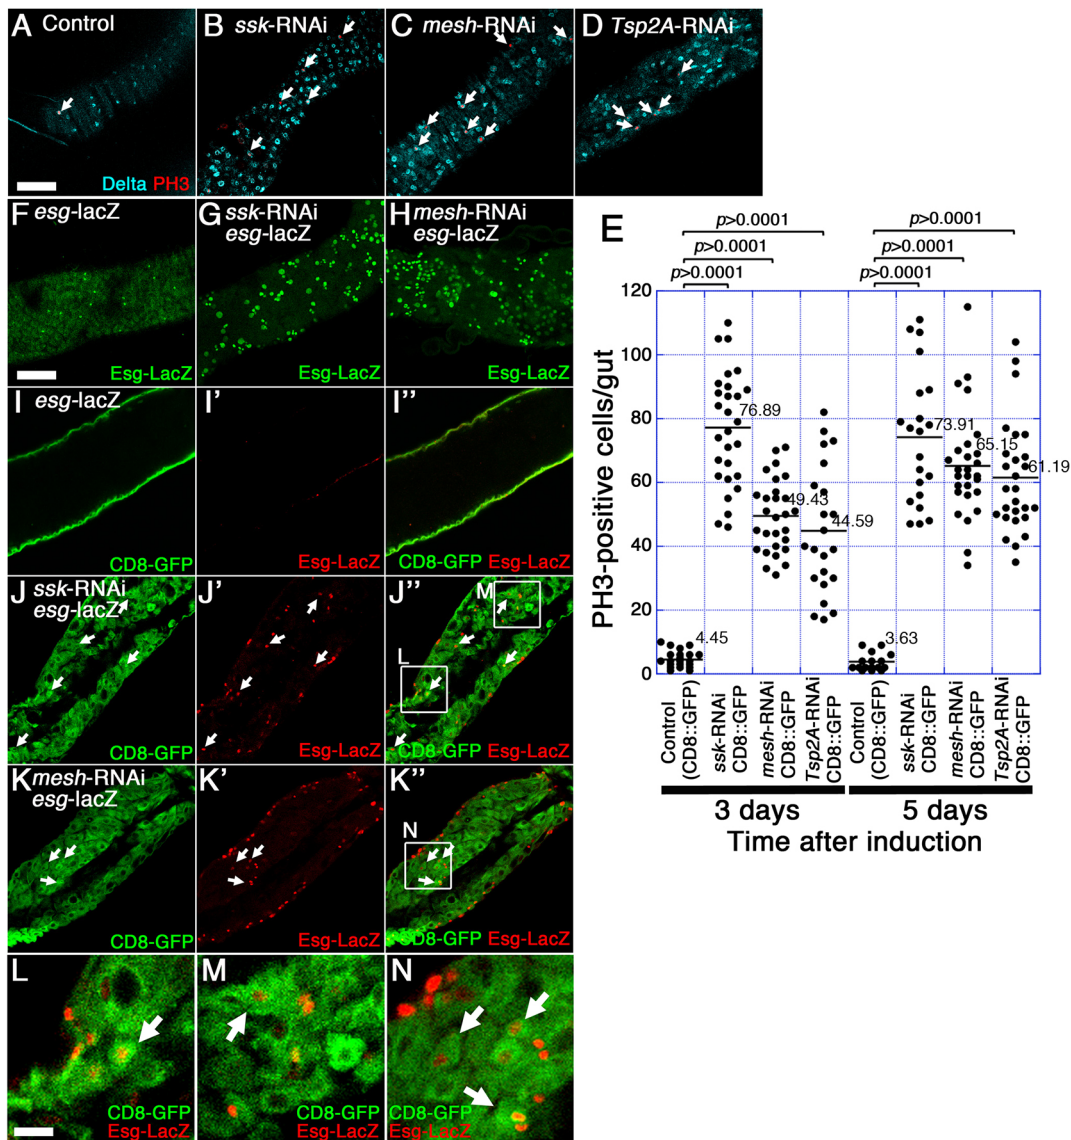

**Fig. 4. Depletion of sSJ proteins from ECs leads to increased ISC proliferation in the midgut.** (A–D) Confocal images of the adult anterior midgut expressing *Myo1A<sup>ts</sup>-GAL4/UAS-CD8-GFP* without (A, control) or with *UAS-ssk-RNAi* (B), *UAS-mesh-RNAi* (C), or *UAS-Tsp2A-RNAi* (D) at 5 days after induction stained for PH3 (red in A–D, arrows) and Delta (blue in A–D). The images show surface views of the midgut. PH3-positive cells and Delta-positive cells are increased in the sSJ-protein-deficient midgut compared with the control midgut (A–D). Scale bar: 50  $\mu$ m. (E) Quantification of PH3-positive cells. The dot-plots show the numbers of PH3-positive cells in individual midguts. Left to right: control (*CD8-GFP*) ( $n=22$ ), *ssk-RNAi CD8-GFP* ( $n=28$ ), *mesh-RNAi CD8-GFP* ( $n=28$ ) and *Tsp2A-RNAi CD8-GFP* ( $n=27$ ) at 3 days after induction; control (*CD8-GFP*) ( $n=16$ ), *ssk-RNAi CD8-GFP* ( $n=21$ ), *mesh-RNAi CD8-GFP* ( $n=27$ ) and *Tsp2A-RNAi CD8-GFP* ( $n=27$ ) at 5 days after induction. Bars and numbers in the graph represent the mean PH3-positive cells in the fly lines. Statistical significance ( $P<0.0001$ ) was evaluated by a one-way ANOVA with Tukey's multiple comparisons test. (F–N) Confocal images of the adult anterior midgut expressing *Myo1A<sup>ts</sup>-GAL4/UAS-CD8-GFP/esg-lacZ* without (F, I–I'', control) or with *UAS-ssk-RNAi* (G, J–J'', L, M) or *UAS-mesh-RNAi* (H, K–K'', N) at 5 days after induction stained for  $\beta$ -galactosidase (green in F–H, red in I', I'', J', J'', K', K'', L–N). The images show surface views of the midgut (F–H) and longitudinal cross-sections through the center of the midgut (I–N). The arrows in J–N indicate *Myo1A<sup>ts</sup>-Gal4*-driven CD8–GFP and Esg–LacZ double-positive cells. L, M and N are enlarged views of the regions outlined by the white boxes in (J'') and (K''), respectively. Scale bars: 50  $\mu$ m (F–K''); 10  $\mu$ m (L–N).

the midgut upon aging or exposure to stress (Osman et al., 2012). To examine whether Upd2 and Upd3 were involved in the increased ISC proliferation and abnormal accumulation of ECs observed in the sSJp-RNAis midgut, we suppressed *mesh* expression in the midgut of the *upd2* and *upd3* double-mutant (*upd2,3<sup>Δ</sup>*) flies through expression of *mesh-RNAi*. In the *mesh-RNAi upd2,3<sup>Δ</sup>* midgut, a large number of mitotic cells were still observed, at a similar level to the *mesh-RNAi* midgut (Fig. 6B,C,G), while only a few mitotic cells were detected in the control and *upd2,3<sup>Δ</sup>* midgut (Fig. 6A,G). Meanwhile, the expansion of the midgut observed in *mesh-RNAi*

flies was significantly reduced in *mesh-RNAi upd2,3<sup>Δ</sup>* flies. At 3 days after RNAi induction, the diameter of the most posterior region of the midgut in *mesh-RNAi upd2,3<sup>Δ</sup>* flies was significantly smaller than that in *mesh-RNAi* flies and was similar to the *upd2,3<sup>Δ</sup>* flies and control flies (Fig. 6H). At 5 days after RNAi induction, the suppressive effect of *upd2,3<sup>Δ</sup>* in *mesh-RNAi* flies in the midgut diameter appeared to be more substantial, but it may include the influence of *upd2,3<sup>Δ</sup>* alone on the midgut because the diameter of the most posterior region of the midgut in *upd2,3<sup>Δ</sup>* flies is smaller than that in control flies in this condition (Fig. 6D–F,H).

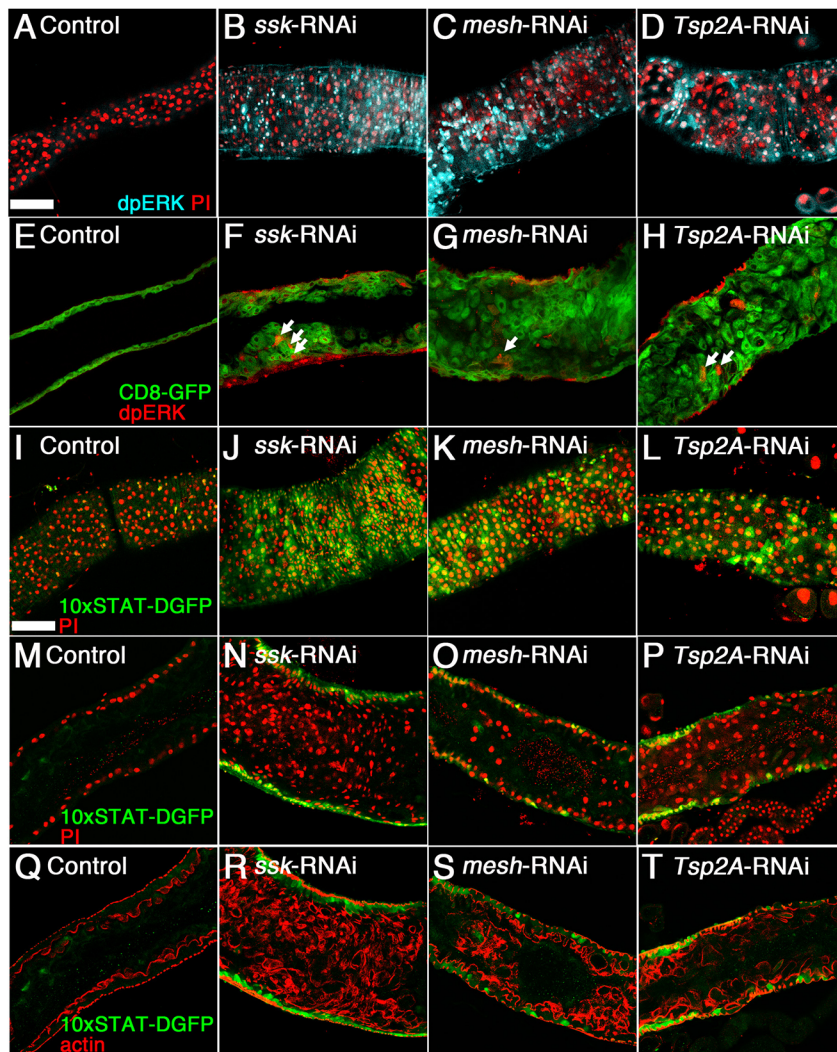

**Fig. 5. The Ras-MAPK Jak-Stat pathways are activated in the sSJ-protein-deficient midgut.** (A–H) Confocal images of the adult anterior midgut expressing *Myo1A<sup>ts</sup>-GAL4/UAS-CD8-GFP* without (A,E, control) or with *UAS-ssk-RNAi* (B,F), *UAS-mesh-RNAi* (C,G), or *UAS-Tsp2A-RNAi* (D,H) at 5 days after induction, stained for dpERK (blue in A–D, red in E–H) and DNA [propidium iodide (PI)] (red in A–D). The images show surface views of the midgut (A–D) and longitudinal cross-sections through the center of the midgut (E–H). Enhancement of the Ras-MAPK pathway activity in the sSJ-protein-deficient midgut is shown by increased expression of dpERK (B–D, F–H). The arrows indicate *Myo1A<sup>ts</sup>-Gal4*-driven CD8–GFP (green) and dpERK double-positive cells. Intense dpERK signals were observed in the sSJ-protein-deficient midgut, not only in cells residing on the basal side of the epithelium, but also in some ECs (B–D, F–H). Scale bar: 50  $\mu$ m. (I–T) Confocal images of the adult anterior midgut expressing *Myo1A<sup>ts</sup>-GAL4/10xSTAT-DGFP* without (I,M,Q, control) or with *UAS-ssk-RNAi* (J,N,R), *UAS-mesh-RNAi* (K,O,S) or *UAS-Tsp2A-RNAi* (L,P,T) at 5 days after induction, stained for GFP (green in I–T), DNA (PI, red in I–P) and F-actin (red in Q–T). The enhancement of Jak-Stat pathway activity in sSJ-protein-deficient midgut is shown by increased expression of the *10xSTAT-DGFP* reporter. The images show surface views of the midgut (I–L) and longitudinal cross-sections through the center of the midgut (M–T). Few DGFP-positive cells were observed in the control midgut (I,M,Q), while DGFP-positive cells were markedly increased on the basal side of the epithelium throughout the sSJ-protein-deficient midgut (J–L,N–P,R–T). M and Q, N and R, O and S, and P and T are each derived from the same sample. Scale bar: 50  $\mu$ m.

Accumulation of ECs was still observed in *mesh-RNAi upd2,3<sup>A</sup>* flies (Fig. 6F). The *upd2,3<sup>A</sup>* flies expressing *mesh-RNAi* in ECs had a shortened lifespan, resembling that of *mesh-RNAi* flies (Fig. S5A–C). The midgut barrier dysfunction seen in *mesh-RNAi* flies was also observed in *mesh-RNAi upd2,3<sup>A</sup>* flies (Fig. S5D), suggesting that Upd2 and Upd3 do not contribute to the loss of barrier function in the midgut. Taken together, our observations suggest that induction of Upd2 and/or Upd3 expression is involved in the aberrant behavior of ECs in the sSJp-RNAis midgut.

#### ***Tsp2A* mutant clones induce non-cell-autonomous stem cell proliferation**

To further validate the effects of sSJ protein depletion on the adult midgut, we generated mitotic clones that lacked *Tsp2A* and simultaneously expressed GFP in the ISC lineage through the mosaic analysis with a repressible cell marker (MARCM) system (Lee and Luo, 2001). The clone size, indicated by the number of GFP-positive cells per clone, of *Tsp2A*-mutant clones was comparable to that of control clones (Fig. 7A,B,G). However, an increased number of PH3-positive cells outside the mutant clones was observed in *Tsp2A*-mutant clones compared with control clones (Fig. 7A,B,H). These results indicate that loss of *Tsp2A* in ECs has a non-cell-autonomous effect on ISC proliferation. In addition, immunostaining with anti-Pdm1 and anti-Prospero (Pros)

antibodies, which label ECs and EEs, respectively (Micchelli and Perrimon, 2006; Ohlstein and Spradling, 2006), revealed that *Tsp2A*-mutant clones contained differentiated ECs and EEs (Fig. 7C–F). These results suggest that loss of *Tsp2A* does not block differentiation of the ISC lineage.

#### **DISCUSSION**

In the *Drosophila* midgut epithelium, the paracellular barrier is mediated by specialized cell–cell junctions known as sSJs (Tepass and Hartenstein, 1994). Our previous studies revealed that three sSJ-associated membrane proteins, Ssk, Mesh and Tsp2A, are essential for the organization and function of sSJs (Yanagihashi et al., 2012; Izumi et al., 2012, 2016). In this study, we depleted the sSJ proteins from ECs in the *Drosophila* adult midgut and showed that they are also required for the barrier function in the adult midgut epithelium. Interestingly, the reduced expression of sSJ proteins in ECs led to remarkably shortened lifespan in adult flies, increased ISC proliferation and intestinal hypertrophy accompanied by accumulation of morphologically aberrant ECs in the midgut. The intestinal hypertrophy caused by *mesh* depletion was reduced by loss of *upd2* and *upd3* without profound suppression of ISC proliferation, without recovery of the shortened lifespan, and without recovery of the midgut barrier dysfunction. We also found that *Tsp2A* mutant clones promoted ISC proliferation in a non-cell-



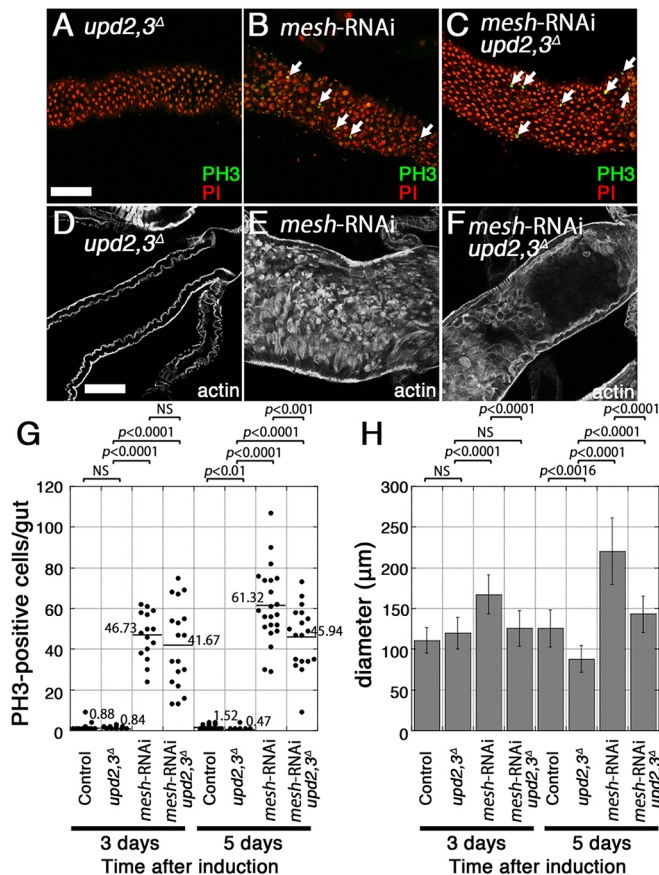

**Fig. 6. Loss of *upd2* and *upd3* reduces abnormal accumulation of ECs in the *mesh*-deficient midgut.** (A–C) Confocal images of the *upd2,3<sup>Δ</sup>* (A), *Myo1A<sup>ts</sup>-GAL4/UAS-mesh-RNAi* (B) and *Myo1A<sup>ts</sup>-GAL4/UAS-mesh-RNAi upd2,3<sup>Δ</sup>* (C) male fly anterior midgut at 5 days after induction stained for PH3 (green, arrows) and DNA [propidium iodide (PI); red]. The images show surface views of the midgut. In the *mesh-RNAi* and *mesh-RNAi upd2,3<sup>Δ</sup>* midgut, the number of PH3-positive cells is increased compared to that in the *upd2,3<sup>Δ</sup>* midgut. Scale bar: 50 μm. (D–F) Confocal images of the *upd2,3<sup>Δ</sup>* (D), *Myo1A<sup>ts</sup>-GAL4/UAS-mesh-RNAi* (E) and *Myo1A<sup>ts</sup>-GAL4/UAS-mesh-RNAi upd2,3<sup>Δ</sup>* (F) male fly midguts at 5 days after induction stained for F-actin (white). The images show longitudinal cross-sections through the center of the midgut. The diameter of the most posterior region of the *mesh-RNAi* midgut is severely expanded compared with the *upd2,3<sup>Δ</sup>* midgut. The diameter of the *mesh-RNAi upd2,3<sup>Δ</sup>* posterior midgut is reduced compared with the *mesh-RNAi* midgut. Scale bar: 50 μm. (G) Quantification of PH3-positive cells in the *mesh-RNAi* and *mesh-RNAi upd2,3<sup>Δ</sup>* male fly midgut. The dot-plots show the numbers of PH3-positive cells in individual midguts. Left to right: control (+/*mesh-RNAi*) ( $n=26$ ), *upd2,3<sup>Δ</sup>* ( $n=19$ ), *mesh-RNAi* (*Myo1A<sup>ts</sup>/mesh-RNAi*) ( $n=22$ ) and *mesh-RNAi upd2,3<sup>Δ</sup>* (*upd2,3<sup>Δ</sup>, Myo1A<sup>ts</sup>/mesh-RNAi*) ( $n=18$ ) at 3 and 5 days after induction. The bars and numbers in the graph represent the mean PH3-positive cells in the fly lines. Statistical significance was evaluated by one-way ANOVA with Tukey's multiple comparisons test. (H) Diameter of the most posterior region of Control (+/*mesh-RNAi*) ( $n=27$ ), *upd2,3<sup>Δ</sup>* ( $n=16$ ), *mesh-RNAi* (*Myo1A<sup>ts</sup>/mesh-RNAi*) ( $n=23$ ) and *mesh-RNAi upd2,3<sup>Δ</sup>* (*upd2,3<sup>Δ</sup>, Myo1A<sup>ts</sup>/mesh-RNAi*) ( $n=19$ ) male fly midgut at 3 and 5 days after induction. The diameter of the midgut was measured just anterior to the Malpighian tubules. Error bars show s.e.m. Statistical significance was evaluated by one-way ANOVA with Tukey's multiple comparisons test. NS, not significant.

autonomous manner. Taken together, we propose that sSJs play a crucial role in maintaining tissue homeostasis through regulation of ISC proliferation and EC behavior in the *Drosophila* adult midgut. The adult *Drosophila* intestine provides a powerful model to investigate the molecular mechanisms behind the emergence and progression of intestinal metaplasia and dysplasia, which are

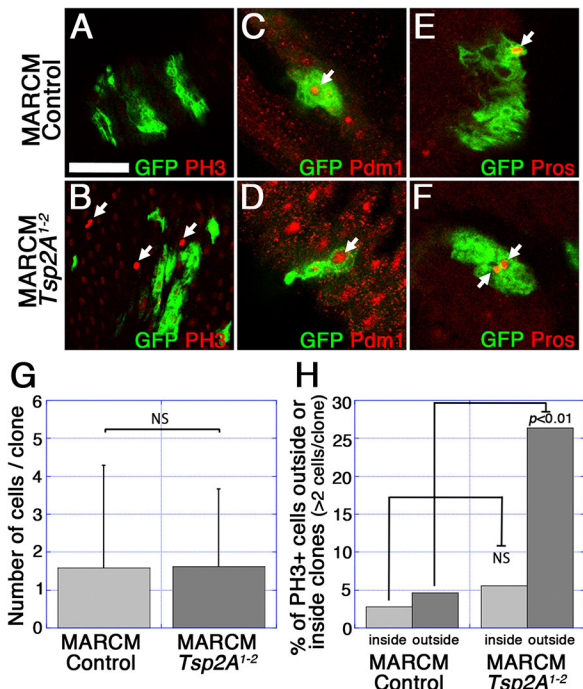

**Fig. 7. *Tsp2A*-mutant clones induce non-cell-autonomous stem cell proliferation.** (A–F) Confocal images of the midgut from control clones (A,C,E) or *Tsp2A<sup>1-2</sup>* mutant clones (B,D,F) stained for GFP (green in A–F), PH3 (red in A,B), Pdm1 (red in C,D) and Pros (red in E,F). The images show surface views of the midgut. Control and *Tsp2A<sup>1-2</sup>* mutant clones were generated using the MARCM system and marked by GFP expression. The *Tsp2A<sup>1-2</sup>* mutant clones induce cell division of neighboring cells (arrows in B). In the *Tsp2A<sup>1-2</sup>* mutant clones, Pdm1- and Pros-positive cells are generated, similar to the control clones (arrows in C–F). Scale bar: 50 μm. (G) Quantification of average clone size for control and *Tsp2A<sup>1-2</sup>* mutant clones. Error bars show s.e.m. Statistical significance was evaluated by the Mann–Whitney *U*-test. NS, not significant. (H) Quantification of control and *Tsp2A<sup>1-2</sup>* mutant clones containing PH3-positive cells on the inside or outside of the clones. A total of 107 control clones and 197 *Tsp2A<sup>1-2</sup>* mutant clones were counted (each clone contained more than two cells). The *P*-value represents a significant difference in pairwise post-test comparisons indicated by the corresponding bars (Fisher's exact test). NS, not significant.

associated with gastrointestinal carcinogenesis in mammals (Li and Jasper, 2016). Given that *Drosophila* intestinal dysplasia is associated with over-proliferation of ISCs and their abnormal differentiation, the intestinal hypertrophy observed in the present study should be categorized as a typical dysplasia in the *Drosophila* intestine. In this study, depletion of sSJ proteins from the ECs was mostly performed through RNAi, which may raise a concern about off-target effects. Nevertheless, it is safe to say that the midgut phenotypes were derived from specific effects of sSJ protein depletion because the essentially same phenotypes were observed in the RNAi lines for different sSJ proteins and additional RNAi lines for *mesh* and *Tsp2A*.

Based on our observations, we hypothesize the following scenario for the hypertrophy generation in the sSJ-protein-deficient midgut. First, depletion of sSJ proteins from ECs leads to disruption of sSJs in the midgut. Second, the impaired midgut barrier function caused by disruption of sSJs results in leakage of harmful substances from the intestinal lumen, thereby inducing the expression of cytokines and growth factors, such as Upd and EGF ligands, in the midgut. Alternatively, disruption of sSJs causes direct activation of a particular signaling pathway that induces expression of cytokines and growth factors by ECs. Third,

proliferation of ISCs is promoted by activation of the Jak-Stat and Ras-MAPK pathways. Fourth, EBs produced by the asymmetric division of ISCs differentiate into ECs with impaired sSJs in response to cytokines such as Upd2 and/or Upd3. Consistent with this scenario, increased mRNA expression of *upd3* in the *ssk-* and *Tsp2A*-deficient midgut has been reported very recently (Salazar et al., 2018; Xu et al., 2019). Finally, the ECs fail to integrate into the epithelial layer and thus become stratified in the midgut lumen to generate hypertrophy. Interestingly, loss of *upd2* and *upd3* reduced the intestinal hypertrophy caused by depletion of *mesh*, but not the increased ISC proliferation. These findings imply that Upd2 and/or Upd3 preferentially promote EB differentiation rather than ISC proliferation. Considering that Upd-Jak-Stat signaling is required for both ISC proliferation and EB differentiation (Jiang et al., 2009), Upd2 and/or Upd3 may predominantly promote EB differentiation and accumulation of ECs, while other cytokines such as Upd1 and/or EGF ligands may activate ISC proliferation in the sSJ-disrupted midgut. Meanwhile, Upd-Jak-Stat signaling-mediated ISC proliferation also occurs during experimental induction of apoptosis of ECs (Jiang et al., 2009). Given that apoptosis of ECs is thought to cause the disruption of epithelial integrity followed by midgut barrier dysfunction, it may induce ISC proliferation by the same mechanism as that observed in the sSJ-protein-deficient midgut. Thus, we cannot exclude a possibility that depletion of sSJ proteins initially causes apoptosis of ECs and thereby leads to increased ISC proliferation. This possibility needs to be examined in future studies. Interestingly, the ISC proliferation induced by the loss of sSJ proteins was non-cell-autonomous. Mechanistically, disruption of the intestinal barrier function caused by impaired sSJs may permit the leakage of particular substances from the midgut lumen, which would induce particular cells to secrete cytokines and growth factors, such as Upd and EGF ligands, and stimulate ISC proliferation. Alternatively, sSJs or sSJ-associated proteins may be directly involved in the secretion of cytokines and growth factors through the regulation of intracellular signaling in the ECs.

In this study, we observed abnormal morphology and aberrant F-actin and Dlg distributions in *ssk-*, *mesh-* and *Tsp2A*-RNAi ECs. Consistent with our results, Chen et al. (2018) recently reported that loss of *mesh* and *Tsp2A* in clones causes defects in polarization and integration of ECs in the adult midgut. In contrast, no remarkable defects in the organization and polarity of ECs were observed in the *ssk-*, *mesh-* and *Tsp2A*-mutant midgut in first-instar larvae (Yanagihashi et al., 2012; Izumi et al., 2012, 2016), suggesting that sSJ proteins are not required for establishment of the initial epithelial apical-basal polarity. This discrepancy may be explained by the marked difference between the larval and adult midguts: ECs in the larval midgut are postmitotic, while those in the adult midgut are capable of regeneration by the stem cell system (Lemaitre and Miguel-Aliaga, 2013). In the sSJ protein-deficient adult midgut, activated proliferation of ISCs generates excessive ECs. These ECs may lack sufficient cell–cell adhesion, because of impaired sSJs, fail to become integrated into the epithelial layer and detach from the basement membrane, leading to loss of normal polarity. Because sSJs seem to be the sole continuous intercellular contacts between adjacent epithelial cells in the midgut (Tepass and Hartenstein, 1994; Baumann, 2001), it is reasonable to speculate that sSJ-disrupted ECs have a reduced ability to adhere to other cells.

A recent study revealed that depletion of the tricellular junction protein Gliotactin from ECs leads to epithelial barrier dysfunction, increased ISC proliferation and blockade of differentiation in the midgut of young adult flies (Resnik-Docampo et al., 2017). In contrast to the findings after depletion of sSJ proteins presented

here, the *gliotactin*-deficient flies did not appear to exhibit intestinal hypertrophy accompanied by accumulation of ECs throughout the midgut. Furthermore, the lifespan of *gliotactin*-deficient flies was found to be longer than that we find for sSJ-protein-deficient flies. The difference in phenotypes found between the Resnik-Docampo et al. (2017) study and our present study may reflect the difference in the degrees of sSJ deficiency – disruption of entire bicellular sSJs or tricellular sSJs only. Aging has also been reported to be correlated with barrier dysfunction, increased ISC proliferation and accumulation of aberrant cells in the adult midgut (Biteau et al., 2008; Rera et al., 2012). The hypertrophy formation in the sSJ-disrupted midgut accompanied by increased ISC proliferation and accumulation of aberrant ECs raise the possibility that disruption of sSJs is the primary cause of the alterations in the midgut epithelium with aging.

During the preparation of our manuscript, two groups published interesting phenotypes of the sSJ-protein-deficient adult midgut in *Drosophila* that are highly related to the present study. Salazar et al. (2018) reported that reduced expression of *ssk* in ECs leads to gut barrier dysfunction, altered gut morphology, increased stem cell proliferation, dysbiosis and reduced lifespan. They also showed that upregulation of *Ssk* in the midgut protects flies against microbial translocation, limits dysbiosis and prolongs lifespan. Meanwhile, Xu et al. (2019) reported that depletion of *Tsp2A* from ISCs and EBs causes accumulation of ISCs and EBs and a swollen midgut with multilayered epithelium, similar to our observations. They also showed that knockdown of *ssk* and *mesh* in ISCs and EBs results in accumulation of ISCs and EBs. Importantly, they demonstrated that *Tsp2A* depletion from ISCs and EBs causes excessive aPKC-Yki-JAK-Stat activity and leads to increased stem cell proliferation in the midgut. They further showed that *Tsp2A* is involved in endocytic degradation of aPKC, which antagonizes the Hippo pathway. Their results strongly suggest that sSJs are directly involved in the regulation of intracellular signaling for ISC proliferation. In their study, *Tsp2A* knockdown in ISCs and EBs caused no defects in the midgut barrier function, in contrast to what we show in the present study. This discrepancy may be due to differences in the GAL4 drivers used in each study or the conditions for the barrier integrity assay (Smurf assay). In addition, Xu et al. (2019) mentioned that MARCM clones generated from ISCs expressing *Tsp2A*-RNAi grow much larger than control clones, while we found no remarkable size difference between *Tsp2A*-mutant clones and control clones. Such discrepancies need to be reconciled by future investigations. To further clarify the mechanistic details for the role of sSJs in stem cell proliferation, it will be interesting to analyze the effects of sSJ protein depletion on the behavior of adult Malpighian tubules, which also have sSJs and a stem cell system (Singh et al., 2007).

In this study, we have demonstrated that sSJs play a crucial role in maintaining tissue homeostasis through regulation of ISC proliferation and EC behavior in the *Drosophila* adult midgut. Our sequential identification of the sSJ proteins *Ssk*, *Mesh* and *Tsp2A* has provided a *Drosophila* model system that can be used to elucidate the roles of the intestinal barrier function by experimental dysfunction of sSJs in the midgut. However, as described in this study, simple depletion of sSJ proteins throughout the adult midgut causes phenotypes that are too drastic, involving not only disruption of the intestinal barrier function but also intestinal dysplasia and subsequent lethality. To investigate the systemic effects of intestinal barrier impairment throughout the life course of *Drosophila*, more modest depletions of sSJ proteins are needed for future studies.



## MATERIALS AND METHODS

### Fly stocks

Fly stocks were reared on a standard cornmeal fly medium at 25°C. *w<sup>1118</sup>* flies were used as wild-type flies unless otherwise specified. The other fly stocks used were: *y w*; *Myo1A-GAL4* [#112001; *Drosophila* Genetic Resource Center (DGRC), Kyoto, Japan], *tubP-GAL80<sup>ts</sup>* [#7019; Bloomington *Drosophila* Stock Center (BDSC), Bloomington, IN], *y w*; *CD8-GFP* (#108068; DGRC), *y w*; *Pim<sup>Y</sup>/CyO*; *UAS-mCD8-GFP* (#5130; BDSC), *w*; *10xStat92E-DGFP/CyO* (#26199; BDSC), *w*; *10xStat92E-DGFP/TM6C Sb Tb* (#26200; BDSC), *y w*; *esg-lacZ/CyO* (#108851; DGRC) and *FRT19A*; *ry* (#106464; DGRC).

The RNAi lines used were: *ssk-RNAi* (Yanagihashi et al., 2012), *mesh-RNAi* [#12074R-1, 12074R-2; Fly Stocks of National Institute of Genetics (NIG-Fly), Mishima, Japan] (Izumi et al., 2012), *Tsp2A-RNAi* (#11415R-2; NIG-Fly *Tsp2AIR1-2*) (Izumi et al., 2016) and *w-RNAi* (#28980; BDSC).

The mutant stocks used were: *Tsp2A<sup>1-2</sup>* (Izumi et al., 2016) and *w upd2<sup>Delta</sup> upd3<sup>Delta</sup>* (#55729; BDSC).

The following stocks were used to generate positively marked MARCM clones: *tub<sup>P</sup>-GAL80 w FRT19A*; *Act5C-GAL4*, *UAS-GFP/CyO* (#42726; BDSC) and *FRT19A tub<sup>P</sup>-GAL80 hsFLP w*; *UAS-mCD8GFP* (#108065; DGRC).

### Conditional expression of UAS transgenes – TARGET system

Flies were crossed and grown at 18°C until eclosion. Adult flies at 2–5 days after eclosion were collected and transferred to 29°C for inactivation of GAL80. All analyses for these experiments were performed on female flies, because their age-related gut pathology is well established (Lemaitre and Miguel-Aliaga, 2013).

### MARCM clone induction

Flies were crossed at 18°C. At 2–5 days after eclosion, adult flies were heat-shocked at 37°C for 1 h twice daily. Adult flies were transferred to fresh vials every 2–3 days and maintained at 25°C for 10 days after clone induction before being dissected.

### Immunostaining

Adult flies were dissected in Hanks' balanced salt solution and the midgut was fixed with 4% paraformaldehyde in PBS with 0.2% Tween-20 for 30 min. The fixed specimens were washed three times with PBS with 0.4% Triton X-100 and blocked with 5% skim milk in PBS with 0.2% Tween-20. Thereafter, the samples were incubated with primary antibodies at 4°C overnight, washed three times with PBS with 0.2% Tween-20 and incubated with secondary antibodies for 3 h. After another three washes, the samples were mounted in Fluoro-KEEPER (12593-64; Nakalai Tesque, Kyoto, Japan). Images were acquired with a confocal microscope (Model TCSSPE; Leica Microsystems, Wetzlar, Germany) using its accompanying software and HC PLAN Apochromat 20× NA 0.7 and HCX PL objective lenses (Leica Microsystems). Images were processed with Adobe Photoshop® software (Adobe Systems Incorporated, San Jose, CA).

### Antibodies

The following primary antibodies were used: rabbit anti-Mesh (955-1; 1:1000) (Izumi et al., 2012); rabbit anti-Tsp2A (302AP; 1:200) (Izumi et al., 2016); rabbit anti-Ssk (6981-1; 1:1000) (Yanagihashi et al., 2012); mouse anti-Dlg [4F3; Developmental Studies Hybridoma Bank (DSHB), Iowa City, IA; 1:50]; mouse anti-Delta (C594.9B; DSHB; 1:20); mouse anti-Pros (MR1A; DSHB; 1:20); rabbit anti-Pdml (a gift from Dr Yu Cai, TEMASEK, Singapore; 1:500; Yeo et al., 1995); rabbit anti-PH3 (06-570; Millipore, Darmstadt, Germany; 1:1000); rabbit anti-dpERK (4370S, Cell Signaling, Danvers, MA; 1:500); rat anti-GFP (GF090R; Nakalai Tesque; 1:1000); rabbit anti-GFP (598; MBL, Nagoya, Japan; 1:1000) and mouse anti-β-galactosidase (Z3781; Promega, Madison, WI; 1:200) antibodies. Alexa Fluor 488-conjugated (A21206; Thermo Fisher Scientific, Waltham, MA) and Cy3- and Cy5-conjugated (Jackson ImmunoResearch Laboratories, West Grove, PA) secondary antibodies were used at 1:400 dilution. Actin was stained with Alexa Fluor 568 phalloidin (A12380; Thermo Fisher Scientific; 1:1000) or Alexa Fluor 647

phalloidin (A22287; Thermo Fisher Scientific; 1:1000). Nuclei were stained with propidium iodide (Nakalai Tesque; 0.1 mg ml<sup>-1</sup>).

### Electron microscopy and Toluidine Blue staining

Adult control, *ssk-*, *mesh-* and *Tsp2A-RNAi* flies at 5 days after transgene induction were dissected and fixed overnight at 4°C with a mixture of 2.5% glutaraldehyde and 2% paraformaldehyde in 0.1 M cacodylate buffer (pH 7.4). The specimens including the midgut were prepared as described previously (Izumi et al., 2012). Ultrathin sections (50–100 nm) were double-stained with 4% hafnium (IV) chloride and lead citrate and observed with a JEM-1011 electron microscope (JEOL, Tokyo, Japan) at an accelerating voltage of 80 kV. For Toluidine Blue staining, sections (0.5–1 μm) mounted on glass slides were placed in 0.05% Toluidine Blue in distilled water for 2–30 min, rinsed in water for 1 min and allowed to air dry. The stained sections were observed with an optical microscope (BX41; Olympus, Tokyo, Japan).

### Barrier integrity assay

For the barrier integrity assay (Smurf assay), flies at 2–5 days of age were placed in empty vials containing a piece of paper soaked in 1% (wt/vol) Blue Dye No. 1 (Tokyo Chemical Industry, Tokyo, Japan)/5% sucrose solution at 50–60 flies/vial. After 2 days at 18°C, the flies were placed in new vials containing paper soaked in BlueDye/sucrose and transferred to 29°C. Loss of midgut barrier function was determined when dye was observed outside the gut (Rera et al., 2011, 2012). Flies were transferred to new vials every 2 days.

### Statistical analyses

Statistical significance was evaluated by means of the Mann–Whitney *U*-test, a Student's *t*-test, one-way ANOVA with Tukey's multiple comparisons test (KaleidaGraph software; Synergy Software, Reading, PA) and the Fisher's exact test. Values of *P*<0.05 were considered significant.

### Acknowledgements

We are grateful to all members of the Furuse laboratories and Kazutaka Akagi (NCGG, Japan) for helpful discussions. We thank the Bloomington *Drosophila* Stock Center, *Drosophila* Genetic Resource Center at Kyoto Institute of Technology and Fly Stocks of National Institute of Genetics (NIG-Fly) for fly stocks. We also thank Alison Sherwin, PhD, from Edanz Group ([www.edanzediting.com/ac](http://www.edanzediting.com/ac)) for editing a draft of this manuscript.

### Competing interests

The authors declare no competing or financial interests.

### Author contributions

Conceptualization: Y.I.; Investigation: Y.I.; Data curation: Y.I., K.F.; Writing - original draft: Y.I.; Writing - review & editing: Y.I., M.F.; Visualization: Y.I., K.F.; Project administration: Y.I.; Funding acquisition: Y.I., M.F.

### Funding

This work was supported by a Grant-in-Aid for Scientific Research (C) (15K07048, 19K06650) to Y.I. from the Japan Society for the Promotion of Science and by Bioscience Research Grants to M.F. from the Takeda Science Foundation.

### Supplementary information

Supplementary information available online at <http://jcs.biologists.org/lookup/doi/10.1242/jcs.232108.supplemental>

### References

- Anderson, J. M. and Van Itallie, C. M. (2009). Physiology and function of the tight junction. *Cold Spring Harb. Perspect. Biol.* **1**, a002584. doi:10.1101/cshperspect.a002584
- Banerjee, S., Sousa, A. D. and Bhat, M. A. (2006). Organization and function of septate junctions: an evolutionary perspective. *Cell Biochem. Biophys.* **46**, 65–78. doi:10.1385/CBB:46:1:65
- Baumann, O. (2001). Posterior midgut epithelial cells differ in their organization of the membrane skeleton from other *Drosophila* epithelia. *Exp. Cell Res.* **270**, 176–187. doi:10.1006/excr.2001.5343
- Beebe, K., Lee, W.-C. and Micchelli, C. A. (2010). JAK/STAT signaling coordinates stem cell proliferation and multilineage differentiation in the *Drosophila* intestinal stem cell lineage. *Dev. Biol.* **338**, 28–37. doi:10.1016/j.ydbio.2009.10.045
- Biteau, B. and Jasper, H. (2011). EGF signaling regulates the proliferation of intestinal stem cells in *Drosophila*. *Development* **138**, 1045–1055. doi:10.1242/dev.056671

- Biteau, B., Hochmuth, C. E. and Jasper, H.** (2008). JNK activity in somatic stem cells causes loss of tissue homeostasis in the aging *Drosophila* gut. *Cell Stem Cell* **3**, 442-455. doi:10.1016/j.stem.2008.07.024
- Buchon, N., Broderick, N. A., Kurashi, T. and Lemaitre, B.** (2010). *Drosophila* EGFR pathway coordinates stem cell proliferation and gut remodeling following infection. *BMC Biol.* **8**, 152. doi:10.1186/1741-7007-8-152
- Chen, J., Sayadian, A.-C., Lowe, N., Lovegrove, H. E. and St Johnston, D.** (2018). An alternative mode of epithelial polarity in the *Drosophila* midgut. *PLoS Biol.* **16**, e3000041. doi:10.1371/journal.pbio.3000041
- Furuse, M. and Izumi, Y.** (2017). Molecular dissection of smooth septate junctions: understanding their roles in arthropod physiology. *Ann. N. Y. Acad. Sci.* **1397**, 17-24. doi:10.1111/nyas.13366
- Furuse, M. and Tsukita, S.** (2006). Claudins in occluding junctions of humans and flies. *Trends Cell Biol.* **16**, 181-188. doi:10.1016/j.tcb.2006.02.006
- Gabay, L., Seger, R. and Shilo, B. Z.** (1997). MAP kinase in situ activation atlas during *Drosophila* embryogenesis. *Development* **124**, 3535-3541.
- Guo, Z. and Ohlstein, B.** (2015). Bidirectional Notch signaling regulates *Drosophila* intestinal stem cell multipotency. *Science* **350**, aab0988. doi:10.1126/science.aab0988
- Izumi, Y. and Furuse, M.** (2014). Molecular organization and function of invertebrate occluding junctions. *Semin. Cell Dev. Biol.* **36**, 186-193. doi:10.1016/j.semcdb.2014.09.009
- Izumi, Y., Yanagihashi, Y. and Furuse, M.** (2012). A novel protein complex, Mesh-Ssk, is required for septate junction formation in the *Drosophila* midgut. *J. Cell Sci.* **125**, 4923-4933. doi:10.1242/jcs.112243
- Izumi, Y., Motoishi, M., Furuse, K. and Furuse, M.** (2016). A tetraspanin regulates septate junction formation in *Drosophila* midgut. *J. Cell Sci.* **129**, 1155-1164. doi:10.1242/jcs.180448
- Jiang, H., Patel, P. H., Kohlmaier, A., Grenley, M. O., Mcewen, D. G. and Edgar, B. A.** (2009). Cytokine/Jak/Stat signaling mediates regeneration and homeostasis in the *Drosophila* midgut. *Cell* **137**, 1343-1355. doi:10.1016/j.cell.2009.05.014
- Jiang, H., Grenley, M. O., Bravo, M.-J., Blumhagen, R. Z. and Edgar, B. A.** (2011). EGFR/Ras/MAPK signaling mediates adult midgut epithelial homeostasis and regeneration in *Drosophila*. *Cell Stem Cell* **8**, 84-95. doi:10.1016/j.stem.2010.11.026
- Karpowicz, P., Perez, J. and Perrimon, N.** (2010). The Hippo tumor suppressor pathway regulates intestinal stem cell regeneration. *Development* **137**, 4135-4145. doi:10.1242/dev.060483
- Lane, N. J., Dallai, R., Martinucci, G. and Burighel, P.** (1994). Electron microscopic structure and evolution of epithelial junctions. In *Molecular Mechanisms of Epithelial Cell Junctions: From Development to Disease* (ed. S. Citi, R.G. Landes Co., USA), pp. 23-43.
- Lee, T. and Luo, L.** (2001). Mosaic analysis with a repressible cell marker (MARCM) for *Drosophila* neural development. *Trends Neurosci.* **24**, 251-254. doi:10.1016/S0166-2236(00)01791-4
- Lemaitre, B. and Miguel-Aliaga, I.** (2013). The digestive tract of *Drosophila melanogaster*. *Annu. Rev. Genet.* **47**, 377-404. doi:10.1146/annurev-genet-111212-133343
- Li, H. and Jasper, H.** (2016). Gastrointestinal stem cells in health and disease: from flies to humans. *Dis. Model. Mech.* **9**, 487-499. doi:10.1242/dmm.024232
- McGuire, S. E., Mao, Z. and Davis, R. L.** (2004). Spatiotemporal gene expression targeting with the TARGET and gene-switch systems in *Drosophila*. *Sci. STKE* **220**, pl6. doi:10.1126/stke.2202004pl6
- Micchelli, C. A. and Perrimon, N.** (2006). Evidence that stem cells reside in the adult *Drosophila* midgut epithelium. *Nature* **439**, 475-479. doi:10.1038/nature04371
- Ohlstein, B. and Spradling, A.** (2006). The adult *Drosophila* posterior midgut is maintained by pluripotent stem cells. *Nature* **439**, 470-474. doi:10.1038/nature04333
- Ohlstein, B. and Spradling, A.** (2007). Multipotent *Drosophila* intestinal stem cells specify daughter cell fates by differential Notch signaling. *Science* **315**, 988-992. doi:10.1126/science.1136606
- Osman, D., Buchon, N., Chakrabarti, S., Huang, Y.-T., Su, W.-C., Poidevin, M., Tsai, Y.-C. and Lemaitre, B.** (2012). Autocrine and paracrine unpaired signaling regulate intestinal stem cell maintenance and division. *J. Cell Sci.* **125**, 5944-5949. doi:10.1242/jcs.113100
- Rera, M., Bahadorani, S., Cho, J., Koehler, C. L., Ulgherait, M., Hur, J. H., Ansari, W. S., Lo, T., Jr., Jones, D. L. and Walker, D. W.** (2011). Modulation of longevity and tissue homeostasis by the *Drosophila* PGC-1 homolog. *Cell Metab.* **14**, 623-634. doi:10.1016/j.cmet.2011.09.013
- Rera, M., Clark, R. I. and Walker, D. W.** (2012). Intestinal barrier dysfunction links metabolic and inflammatory markers of aging to death in *Drosophila*. *Proc. Natl. Acad. Sci. USA* **109**, 21528-21533. doi:10.1073/pnas.1215849110
- Resnik-Docampo, M., Koehler, C. L., Clark, R. I., Schinaman, J. M., Sauer, V., Wong, D. M., Lewis, S., D'Alterio, C., Walker, D. W. and Jones, D. L.** (2017). Tricellular junctions regulate intestinal stem cell behaviour to maintain homeostasis. *Nat. Cell Biol.* **19**, 52-59. doi:10.1038/ncb3454
- Salazar, A. M., Resnik-Docampo, M., Ulgherait, M., Clark, R. I., Shirasu-Hiza, M., Jones, D. L. and Walker, D. W.** (2018). Intestinal Snakeskin Limits Microbial Dysbiosis during Aging and Promotes Longevity. *iScience* **9**, 229-243. doi:10.1016/j.isci.2018.10.022
- Shaw, R. L., Kohlmaier, A., Polesello, C., Veelken, C., Edgar, B. A. and Tapon, N.** (2010). The Hippo pathway regulates intestinal stem cell proliferation during *Drosophila* adult midgut regeneration. *Development* **137**, 4147-4158. doi:10.1242/dev.052506
- Singh, S. R., Liu, W. and Hou, S. X.** (2007). The adult *Drosophila* malpighian tubules are maintained by multipotent stem cells. *Cell Stem Cell* **1**, 191-203. doi:10.1016/j.stem.2007.07.003
- TePASS, U. and Hartenstein, V.** (1994). The development of cellular junctions in the *Drosophila* embryo. *Dev. Biol.* **161**, 563-596. doi:10.1006/dbio.1994.1054
- TePASS, U., Tanentzapf, G., Ward, R. and Fehon, R.** (2001). Epithelial cell polarity and cell junctions in *Drosophila*. *Annu. Rev. Genet.* **35**, 747-784. doi:10.1146/annurev.genet.35.102401.091415
- Wu, V. M. and Beitel, G. J.** (2004). A junctional problem of apical proportions: epithelial tube-size control by septate junctions in the *Drosophila* tracheal system. *Curr. Opin. Cell Biol.* **16**, 493-499. doi:10.1016/j.ccb.2004.07.008
- Xu, C., Tang, H. W., Hung, R. J., Hu, Y., Ni, X., Housden, B. E. and Perrimon, N.** (2019). The septate junction protein Tsp2A restricts intestinal stem cell activity via endocytic regulation of aPKC and Hippo signaling. *Cell Rep.* **26**, 670-688.e676. doi:10.1016/j.celrep.2018.12.079
- Yanagihashi, Y., Usui, T., Izumi, Y., Yonemura, S., Sumida, M., Tsukita, S., Uemura, T. and Furuse, M.** (2012). Snakeskin, a membrane protein associated with smooth septate junctions, is required for intestinal barrier function in *Drosophila*. *J. Cell Sci.* **125**, 1980-1990. doi:10.1242/jcs.096800
- Yeo, S. L., Lloyd, A., Kozak, K., Dinh, A., Dick, T., Yang, X., Sakonju, S. and Chia, W.** (1995). On the functional overlap between two *Drosophila* POU homeo domain genes and the cell fate specification of a CNS neural precursor. *Genes Dev.* **9**, 1223-1236. doi:10.1101/gad.9.10.1223
- Zhou, F., Rasmussen, A., Lee, S. and Agaisse, H.** (2013). The UPD3 cytokine couples environmental challenge and intestinal stem cell division through modulation of JAK/STAT signaling in the stem cell microenvironment. *Dev. Biol.* **373**, 383-393. doi:10.1016/j.ydbio.2012.10.023
